# Supplementary material for: Early Alterations of RNA Binding Protein (RBP) Homeostasis and ER Stress-Mediated Autophagy Contributes to Progressive Retinal Degeneration in the rd10 Mouse Model of Retinitis Pigmentosa (RP)
Source: MDPI journal article supplement (doi:10.3390/cells12071094), 2023-04-06
Supplement: s1 [file s1]

**Figure S1**

**a**

PDI

wt-P26 rd10-P17 rd10-P26

GCL IPL INL ONL

**b**

Biorad all blue

MW (kDa)

250 kD  
150  
100  
75  
50  
37  
25  
20  
15  
10

**c**

Figure 1i

MW (kDa)

50

1 2 3 4 5 6 7 8 9 10

pPERK

100

75

GRP78

25

SigR1

50

PDI

50

Tubulin

**d**

Loading scheme

WT-P26 rd10-P16 rd10-P26

1 2 3 4 5 6 7 8 9 10

**e**

Figure 2d

LC3

1 2 3 4 5 6 7 8 9 10

15

LC3

50

p62

1 2 3 4 5 6 7 8 9 10

50

Tubulin

50

Calreticulin

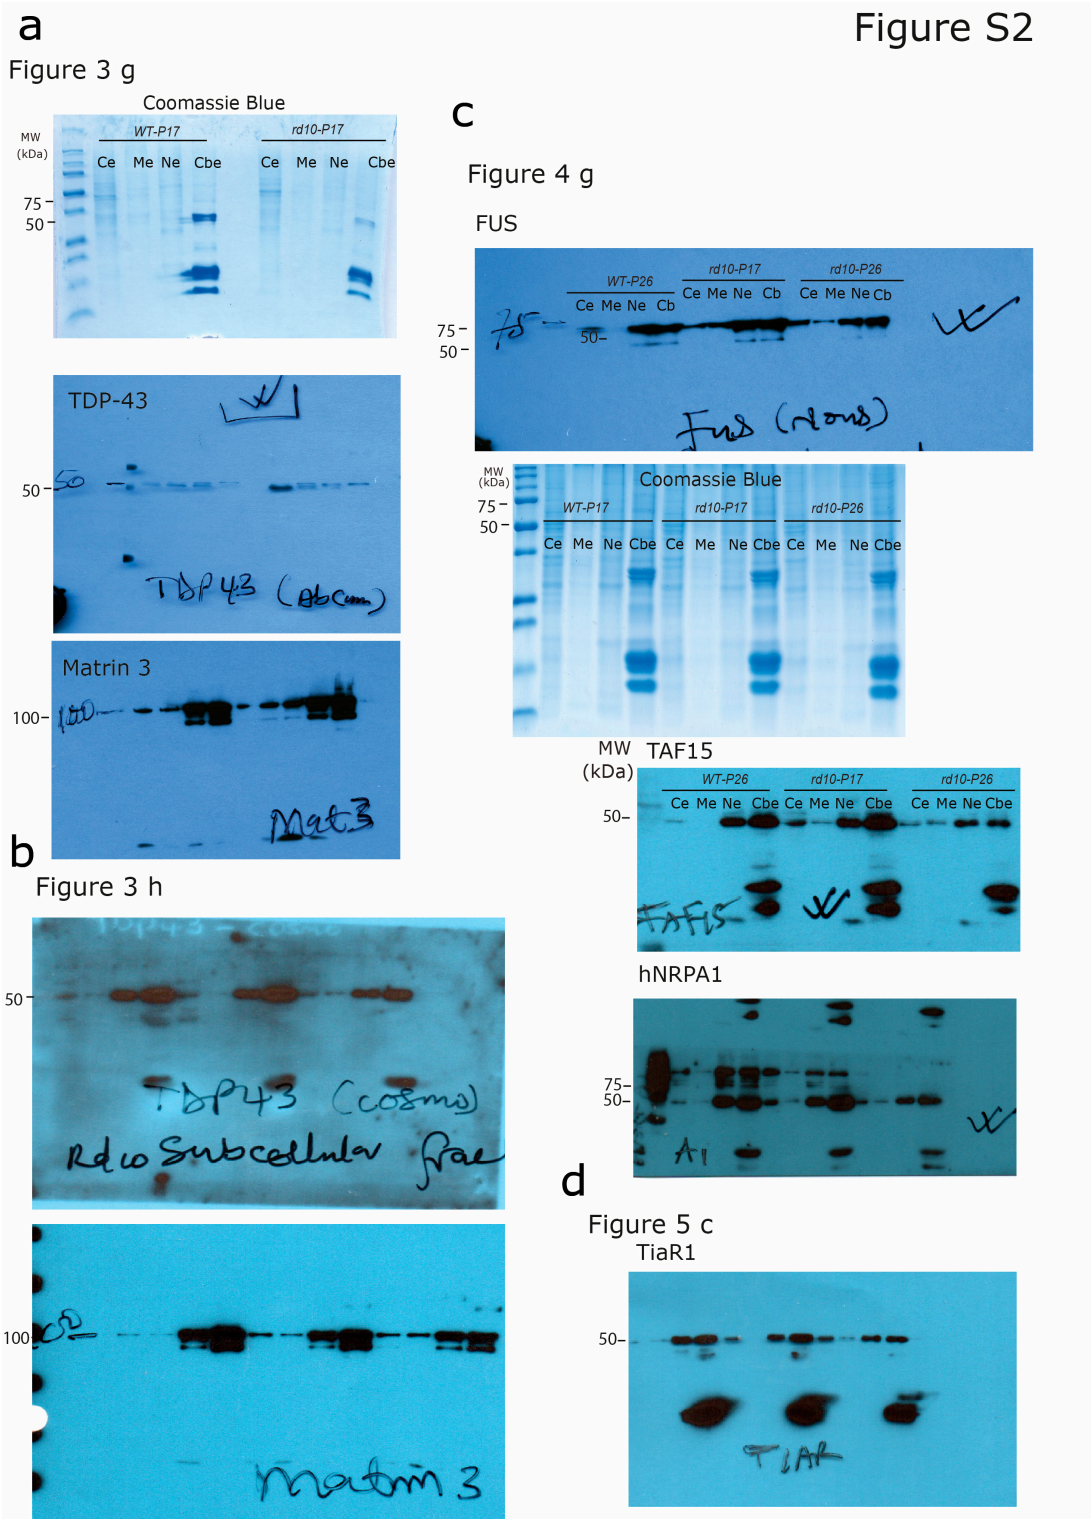

**Table S1.** List of primary and secondary antibodies used in this study, previously used by us in the references below: [1–7].

| Antibody                         | Commercial Source  | Species       | Reference      | Working Dilution |        |
|----------------------------------|--------------------|---------------|----------------|------------------|--------|
|                                  |                    |               |                | IHC/IF           | IB     |
| Primary antibody                 |                    |               |                |                  |        |
| Calreticulin (D3E6)              | Cell signaling     | Rabbit        | 12238S         | 1:150            |        |
| PKcα                             | Abcam              | Mouse         | ab86715        | 1:100            |        |
| Cabp                             | Sigma Aldrich      | Mouse         | C9848          | 1:100            |        |
| Cabp                             | Abcam              | Rabbit        | ab11246        | 1:100            |        |
| Anti-GRP78 (Bip)                 | BD Biosciences     | Mouse         | 610978         | 1:100            | 1:1000 |
| Anti-pPERK                       | Cell signalling    | Rabbit        | 3179S          | 1:100            | 1:1000 |
| Anti-PDI                         | Cell signalling    | Rabbit        | 2446S          | 1:100            | 1:1000 |
| Anti-GADD 153 (R-20)             | Santa Cruz Biotech | Rabbit        | SC-793         | 1:100            | -      |
| Anti-SigR1                       | Proteintech        | Rabbit polycl | 15168-1-AP     | 1:100            | -      |
| Anti-SigR1                       | Sigma Aldrich      | Rabbit        | HPA018002      | 1:100            | 1:1000 |
| Anti-SigR1                       | Santa Cruz         | Mouse         | Sc-166392      | 1:50             | 1:1000 |
| Anti-P62/SQSTM1                  | MBL                | Rabbit        | PM045          | 1:200            | 1:5000 |
| Anti-P62/SQSTM1                  | Sigma Aldrich      | Rabbit        | P0067          | 1:100            | 1:5000 |
| Anti-P62/SQSTM1                  | Abcam              | Mouse         | Ab56416        | 1:100            | -      |
| Anti-LC3                         | Sigma Aldrich      | Rabbit        | L7543          | 1:100            | 1:5000 |
| Anti-pTDP43                      | Cosmo Bio Co. LTD  | Mouse         | TIP-PTD-M01    | 1:5000           | -      |
| Anti-TDP-43 C-terminus (405-414) | Cosmo Bio Co. LTD  | Rabbit        | TIP-TD-P09     | -                | 1:100  |
| Anti-TDP43                       | Abcam              | Mouse         | Ab57105        | -                | 1:1000 |
| Anti-Matrin3                     | Bethyl             | Rabbit        | IHC-00081      | 1:200            | -      |
| Anti-Matrin3                     | Bethyl             | Rabbit        | A300-591A      | -                | 1:1000 |
| Anti-Fus                         | Novus Biologicals  | Rabbit        | NB100-2599     | 1:100            | 1:1000 |
| Anti-Fus                         | Sigma Aldrich      | Mouse         | AMAb90549      | 1:100            | 1:1000 |
| Anti-TIAR                        | BD Biosciences     | Mouse         | 610352         | 1:100            | 1:1000 |
| Anti-EWSR1                       | Sigma Aldrich      | Rabbit        |                | 1:100            | 1:1000 |
| Anti-TAFII68                     | Bethyl             | Rabbit        | IHC-00094      | 1:100            | 1:1000 |
| Anti-hnRNP A1                    | Novus Biologicals  | Mouse         | NB100-672      | 1:100            | 1:1000 |
| Anti-hnRNP A2/B1                 | Santa Cruz Biotech | Mouse         | SC-32316       | 1:100            | 1:1000 |
| Anti α-Tubulin                   | Sigma Aldrich      | Mouse         | T5168          | -                | 1:1000 |
| Secondary antibody               |                    |               |                |                  |        |
| Poly HRP-GAMs/Rb IgG             | Immunologica VWR   | Ms/Rb         | VWRKDPVB500HRP | Ready-to-use     |        |
| Poly HRP-Anti Goat IgG           | Immunologica VWR   | Goat          | VWRKDPVG110HRP | Ready-to-use     |        |

|                                         |                      |        |        |         |
|-----------------------------------------|----------------------|--------|--------|---------|
| Alexa Fluor 488<br>goat anti-<br>mouse  | Life<br>Technologies | Goat   | A11001 | 1:500   |
| Alexa Fluor 555<br>goat anti-<br>mouse  | Life<br>Technologies | Goat   | A21424 | 1:500   |
| Alexa Fluor 488<br>goat anti-rabbit     | Life<br>Technologies | Goat   | A11008 | 1:500   |
| Alexa Fluor 546<br>goat anti-rabbit     | Life<br>Technologies | Goat   | A11010 | 1:500   |
| Alexa Fluor 488<br>donkey anti-<br>goat | Life<br>Technologies | Donkey | A11055 | 1:500   |
| Goat anti-<br>mouse IgG<br>(H+L), HRP   | Thermo<br>Scientific | Goat   | 31430  | 1:10000 |
| Goat anti-<br>rabbit IgG<br>(H+L), HRP  | Thermo<br>Scientific | Goat   | 31460  | 1:10000 |

**Table S2.** Semi-quantitative analysis of DAB and immunofluorescence staining.

|                                                 | Wt-p26 |     |     | Wt-p50 |     |     | rd10-p17 |      |     | rd10-p19 |      |     | rd10-p26 |     |     | rd-p50 |     |     |
|-------------------------------------------------|--------|-----|-----|--------|-----|-----|----------|------|-----|----------|------|-----|----------|-----|-----|--------|-----|-----|
|                                                 | ONL    | INL | GCL | ONL    | INL | GCL | ONL      | INL  | GCL | ONL      | INL  | GCL | ONL      | INL | GCL | ONL    | INL | GCL |
| <b>Calcium binding/buffering chaperones</b>     |        |     |     |        |     |     |          |      |     |          |      |     |          |     |     |        |     |     |
| calreticulin                                    | +      | +   | +   | +      | +   | +   | ++       | +++  | ++  | NA       | NA   | NA  | +++      | ++  | +++ | NA     | ++  | +   |
| pPERK                                           | +      | +   | +   | +      | +   | +   | ++       | +++  | ++  | NA       | NA   | NA  | +++      | ++  | ++  | NA     | NA  | NA  |
| PDI                                             | +      | +   | +   | +      | +   | +   | ++       | +++  | +++ | NA       | NA   | NA  | +++      | +++ | +++ | NA     | NA  | NA  |
| <b>ER stress markers</b>                        |        |     |     |        |     |     |          |      |     |          |      |     |          |     |     |        |     |     |
| grp78                                           | +      | +   | +   | +      | +   | +   | ++       | ++   | ++  | NA       | NA   | NA  | ++       | ++  | +++ | NA     | NA  | NA  |
| gadd-153                                        | +      | +   | +   | +      | +   | +   | ++       | ++   | ++  | NA       | NA   | NA  | ++       | ++  | ++  | NA     | NA  | NA  |
| SigR1                                           | +      | +   | +   | +      | +   | +   | ++       | ++   | ++  | NA       | NA   | NA  | +++      | ++  | ++  | NA     | NA  | NA  |
| <b>Autophagy adapter/autophagosomes markers</b> |        |     |     |        |     |     |          |      |     |          |      |     |          |     |     |        |     |     |
| p62                                             | +      | +   | +   | +      | +   | +   | ++       | +++  | ++● | NA       | NA   | NA  | ++       | ++● | ++  | NA     | NA  | NA  |
| LC3                                             | +      | +   | +   | +      | +   | +   | +++      | +++  | ++  | NA       | NA   | NA  | ++       | +++ | ++  | NA     | ++  | ++  |
| <b>RNA binding proteins/stress granules</b>     |        |     |     |        |     |     |          |      |     |          |      |     |          |     |     |        |     |     |
| pTDP43                                          | +      | +   | +   | +      | +   | +   | +++●     | +++● | ++● | +++●     | +++● | ++● | ++●      | ++● | ++● | NA     | ++● | ++● |
| Matrin 3                                        | +      | +   | +   | +      | +   | +   | ++       | ++   | ++  | NA       | NA   | NA  | ++       | ++  | ++  | NA     | NA  | NA  |
| Fus                                             | +      | +   | +   | +      | +   | +   | +++●     | +++● | ++● | +++●     | ++●  | ++● | ++       | ++● | ++● | NA     | NA  | NA  |
| EWSR1                                           | +      | +   | +   | +      | +   | +   | +++●     | +++● | ++● | ++●      | ++●  | ++● | ++●      | ++● | ++● | NA     | NA  | NA  |
| hnRNPA1                                         | +      | +   | +   | +      | +   | +   | ++●      | +++● | ++  | NA       | NA   | NA  | ++●      | ++  | ++  | NA     | NA  | NA  |
| hnRNPA2B1                                       | +      | +   | +   | +      | +   | +   | +++●     | +++● | ++● | NA       | NA   | NA  | ++●      | ++  | ++  | NA     | NA  | NA  |
| Tia1                                            | +      | +   | +   | +      | +   | +   | +++●     | +++● | ++● | NA       | NA   | NA  | ++●      | ++  | ++  | NA     | NA  | NA  |

+++ strong immunoreactivity/accumulation, ++ moderate immunoreactivity/accumulation, + mild immunoreactivity, ● aggregates, Not available, NA- not included in the study.

**Table S3.** Age group of wild-type/*rd10* mouse retinae and fixation protocols.

| Experimental Methods                        | Age Group of Mouse Retinae (Left and Right) |                                                           | Fixation Protocol      |
|---------------------------------------------|---------------------------------------------|-----------------------------------------------------------|------------------------|
|                                             | Wild-Type<br>(C57BL/6)                      | <i>Rd10</i><br>(C57BL/6J- <i>Pde6b</i><br><i>rd10/j</i> ) |                        |
| Hematoxylin & Eosin staining (H&E)          | P17, <i>n</i> = 3                           | P17, <i>n</i> = 3                                         | 4% PFA                 |
|                                             | P19, <i>n</i> = 3                           | P19, <i>n</i> = 3                                         |                        |
|                                             | P26, <i>n</i> = 3                           | P26, <i>n</i> = 3                                         |                        |
|                                             | P50, <i>n</i> = 3                           | P50, <i>n</i> = 3                                         |                        |
| Diaminobenzidine (DAB) Immunohistochemistry | P26, <i>n</i> = 3                           | P17, <i>n</i> = 3<br>P26, <i>n</i> = 3                    | 4% PFA                 |
|                                             |                                             |                                                           |                        |
| Immunofluorescence                          | P17, <i>n</i> = 3                           | P17, <i>n</i> = 3                                         | 4% PFA                 |
|                                             | P26, <i>n</i> = 3                           | P26, <i>n</i> = 3                                         |                        |
|                                             | P50, <i>n</i> = 3                           | P50, <i>n</i> = 3                                         |                        |
| Transmission Electron Microscopy (TEM)      |                                             | P19, <i>n</i> = 3<br>P22, <i>n</i> = 3                    | 2.5% glutaraldehyde    |
|                                             |                                             |                                                           |                        |
| Western Blot                                | P26, <i>n</i> = 3                           | P17, <i>n</i> = 4<br>P26, <i>n</i> = 3                    | Fresh<br>(No fixation) |
| Subcellular Fractionation                   | P17, <i>n</i> = 3                           | P17, <i>n</i> = 3                                         | Fresh<br>(No fixation) |
|                                             | P26, <i>n</i> = 3                           | P26, <i>n</i> = 3                                         |                        |
| Filter Trap Assay                           | P26, <i>n</i> = 3                           | P17, <i>n</i> = 3<br>P26, <i>n</i> = 3                    | Fresh<br>(No fixation) |

PFA: Paraformaldehyde.

## References

1. Tripathi, P.; Guo, H.; Dreser, A.; Yamoah, A.; Sechi, A.; Jesse, C.M.; Katona, I.; Doukas, P.; Nikolin, S.; Ernst, S.; et al. Pathomechanisms of ALS8: Altered autophagy and defective RNA binding protein (RBP) homeostasis due to the VAPB P56S mutation. *Cell Death. Dis.* **2021**, *12*, 466. <https://doi.org/10.1038/s41419-021-03710-y>.
2. Yamoah, A.; Tripathi, P.; Sechi, A.; Kohler, C.; Guo, H.; Chandrasekar, A.; Nolte, K.W.; Wruck, C.J.; Katona, I.; Anink, J.; et al. Aggregates of RNA Binding Proteins and ER Chaperones Linked to Exosomes in Granulovacuolar Degeneration of the Alzheimer's Disease Brain. *J. Alzheimers Dis.* **2020**, *75*, 139–156. <https://doi.org/10.3233/JAD-190722>.
3. Dreser, A.; Vollrath, J.T.; Sechi, A.; Johann, S.; Roos, A.; Yamoah, A.; Katona, I.; Bohlega, S.; Wiemuth, D.; Tian, Y.; et al. The ALS-linked E102Q mutation in Sigma receptor-1 leads to ER stress-mediated defects in protein homeostasis and dysregulation of RNA-binding proteins. *Cell Death Differ.* **2017**, *24*, 1655–1671. <https://doi.org/10.1038/cdd.2017.88>.
4. Jesse, C.M.; Bushuven, E.; Tripathi, P.; Chandrasekar, A.; Simon, C.M.; Drepper, C.; Yamoah, A.; Dreser, A.; Katona, I.; Johann, S.; et al. ALS-Associated Endoplasmic Reticulum Proteins in Denervated Skeletal Muscle: Implications for Motor Neuron Disease Pathology. *Brain. Pathol.* **2017**, *27*, 781–794. <https://doi.org/10.1111/bpa.12453>.
5. Goswami, A.; Jesse, C.M.; Chandrasekar, A.; Bushuven, E.; Vollrath, J.T.; Dreser, A.; Katona, I.; Beyer, C.; Johann, S.; Feller, A.C.; et al. Accumulation of STIM1 is associated with the degenerative muscle fibre phenotype in ALS and other neurogenic atrophies. *Neuropathol. Appl. Neurobiol.* **2015**, *41*, 304–318.

6. Vollrath, J.T.; Sechi, A.; Dreser, A.; Katona, I.; Wiemuth, D.; Vervoorts, J.; Dohmen, M.; Chandrasekar, A.; Prause, J.; Brauers, E.; et al.. Loss of function of the ALS protein SigR1 leads to ER pathology associated with defective autophagy and lipid raft disturbances. *Cell Death. Dis.* **2014**, *12*, 243.
7. Filezac de L'Etang, A.; Maharjan, N.; Cordeiro Brana, M.; Ruegsegger, C.; Rehmann, R.; Goswami, A.; Roos, A.; Troost, D.; Schneider, B.L.; Weis, J.; et al. Marinesco-Sjogren syndrome protein SIL1 regulates motor neuron subtype-selective ER stress in ALS. *Nat. Neurosci.* **2015**, *18*, 227–238.
